# Supplementary material for: Light microscopy based approach for mapping connectivity with molecular specificity
Source: bioRxiv or medRxiv preprint supplement (doi:10.1101/2020.02.24.963538), 2020-02-25
Supplement: Supplementary file [file media-3.pdf]

| <b>Target</b>  | <b>Vendor</b>       | <b>Catalog Number</b> | <b>Host Species</b> |
|----------------|---------------------|-----------------------|---------------------|
| VGAT           | Synaptic Systems    | 131 011               | Ms                  |
| Calbindin      | Synaptic Systems    | 214 002               | Rb                  |
| PV             | Synaptic Systems    | 195 004               | Gp                  |
| PV             | Abcam               | ab32895               | Gt                  |
| Homer1         | Synaptic Systems    | 160 002               | Rb                  |
| Gephyrin       | Synaptic Systems    | 147 111               | Ms                  |
| Bassoon        | Synaptic Systems    | 141 004               | Gp                  |
| CamKII         | Abcam               | ab22609               | Ms                  |
| TH             | Abcam               | ab76442               | Ck                  |
| NOS            | Sigma               | n2780                 | Rb                  |
| NPY            | Millipore           | ab1583                | Sh                  |
| Somatostatin   | Millipore           | mab354                | Rat                 |
| VIP            | Immunostar          | 20077                 | Rb                  |
| Calretinin     | Synaptic Systems    | 214 104               | Gp                  |
| SMI-312        | Biologend           | 837904                | Ms                  |
| SERT           | Synaptic Systems    | 340 003               | Rb                  |
| CB1R           | Synaptic Systems    | 258 003               | Rb                  |
| D2R            | Synaptic Systems    | 376 203               | Rb                  |
| D1R            | Sigma               | D2944                 | Rat                 |
| GFAP           | Dako Agilent        | Z033401               | Rb                  |
| Vglut2         | Synaptic Systems    | 135 404               | Gp                  |
| IBA1           | Synaptic Systems    | 234 004               | Gp                  |
| MBP            | Synaptic Systems    | 295 002               | Rb                  |
| Lectin         | Vector Labs         | DL-1177               |                     |
| GAD67          | Millipore           | mab5406               | Ms                  |
| SomatostatinSC | Santa Cruz          | YC7                   | Rat                 |
| GephyrinSC     | Santa Cruz          | G6                    | Ms                  |
| PV             | Abcam               | ab11427               | Rb                  |
| NeuN           | Millipore           | mab377                | Ms                  |
| Homer1         | Synaptic Systems    | 160 006               | Ck                  |
| GFAP           | Sigma               | G3893                 | Ms                  |
| CTIP2          | Abcam               | ab18465               | Rat                 |
| tagBFP         | Cai Lab custom made | NA                    | Gp                  |
| mCherry        | Cai Lab custom made | NA                    | Rb                  |
| GFP            | Biorad              | 4745-1051             | Sh                  |
