# Supplementary material for: Light microscopy based approach for mapping connectivity with molecular specificity
Source: bioRxiv or medRxiv preprint supplement (doi:10.1101/2020.02.24.963538), 2020-02-25
Supplement: Supplementary file [file media-4.pdf]

| <b>Target</b> | <b>Vendor</b>          | <b>Catalog Number</b> | <b>Host Species</b> |
|---------------|------------------------|-----------------------|---------------------|
| Rb-AF488      | Jackson ImmunoResearch | 711-545-152           | Dk                  |
| Rb-Cy3        | Jackson ImmunoResearch | 711-166-152           | Dk                  |
| Rb-AF647      | Jackson ImmunoResearch | 711-605-152           | Dk                  |
| Gp-AF488      | Jackson ImmunoResearch | 706-545-148           | Dk                  |
| Gp-Cy3        | Jackson ImmunoResearch | 706-166-148           | Dk                  |
| Gp-AF647      | Jackson ImmunoResearch | 706-606-148           | Dk                  |
| Sh-AF488      | Jackson ImmunoResearch | 713-546-147           | Dk                  |
| Sh-Cy3        | Jackson ImmunoResearch | 713-166-147           | Dk                  |
| Rat-AF488     | Jackson ImmunoResearch | 712-545-150           | Dk                  |
| Rat-AF647     | Jackson ImmunoResearch | 712-606-153           | Dk                  |
| Ck-AF488      | Jackson ImmunoResearch | 703-546-155           | Dk                  |
| Ck-AF647      | Jackson ImmunoResearch | 703-606-155           | Dk                  |
| Ms-AF488      | Jackson ImmunoResearch | 715-546-151           | Dk                  |
| Ms-Cy3        | Jackson ImmunoResearch | 715-166-151           | Dk                  |
| Ms-AF647      | Jackson ImmunoResearch | 715-606-151           | Dk                  |
